# Supplementary material
Source: PubMed Central journal article supplement (PMC6136090)
Supplement: la8b01934_si_001.pdf [file la8b01934_si_001.pdf]

## SUPPORTING INFORMATION

### **Contactless control of local surface buckling in photoaligned gold/liquid crystal polymer bilayers**

*Laurens T. de Haan, Timo J.J. Willigers, Levina E.A. Wijkhuijs, Matthew Hendrikx, Cuong Thai Nguyen, Philippe Leclère, Anne E.J. Souren, Guofu Zhou, and Michael G. Debije*

4 Pages

4 Figures

1 Table

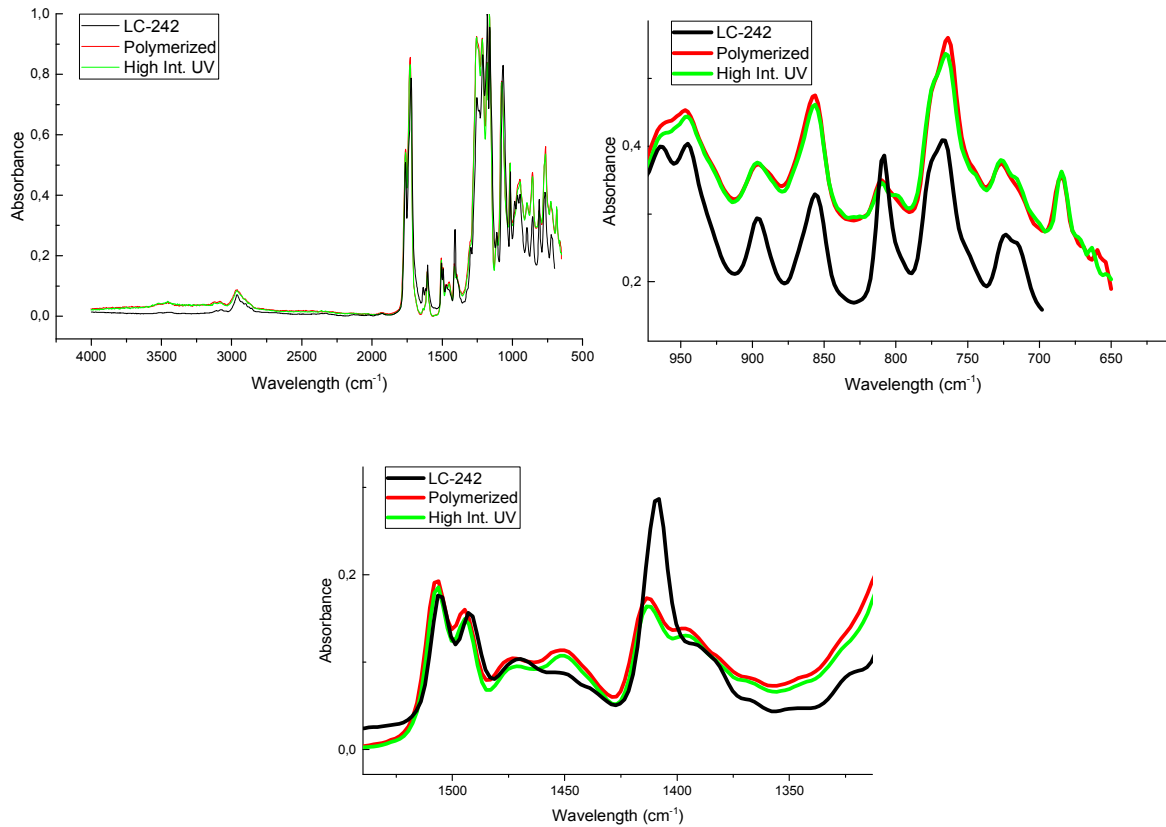

**Figure S1.** (Top left) IR spectra of pure LC-242, polymerized LC-242 layer and after high intensity UV light. (Top right) IR spectra of pure LC-242, polymerized LC-242 layer and LC-242 layer after high intensity UV light exposure ( $1000\text{-}650\text{ cm}^{-1}$ ). (Bottom) IR spectra of pure LC-242, polymerized LC-242 layer and LC-242 layer after high intensity UV light exposure ( $1550\text{-}1300\text{ cm}^{-1}$ ). The primary peaks corresponding to the acrylates are around  $810$  and  $1410\text{ cm}^{-1}$ : these peaks are absent in the spectra in the UV-exposed LC networks.

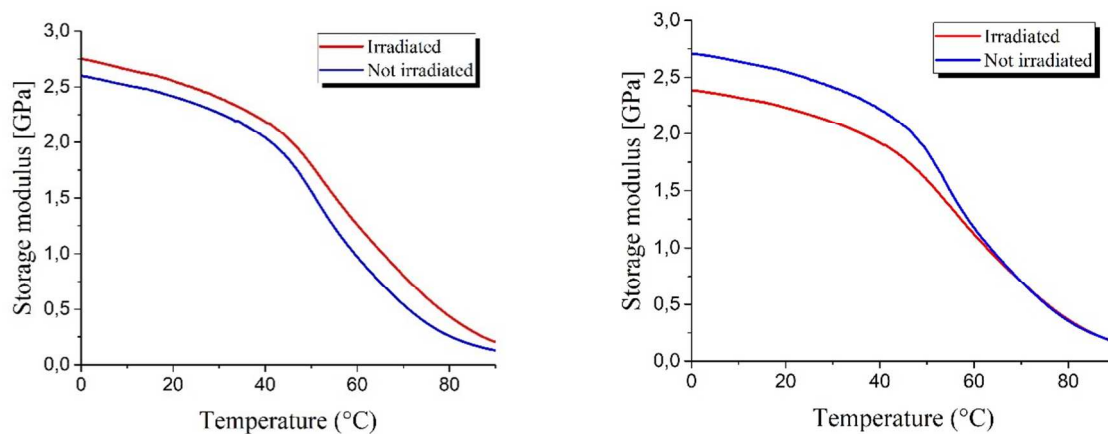

**Figure S2.** Measured storage modulus of representative LC films (left) parallel and (right) perpendicular both before (blue) and after (red) after exposure to 10 minutes of high intensity UV light ( $9.2\text{-}10.5\text{ J/cm}^2$ ). The film measured demonstrated a somewhat modest degree of order, resulting in somewhat similar moduli measured for the two directions, parallel and perpendicular to the liquid crystal director.

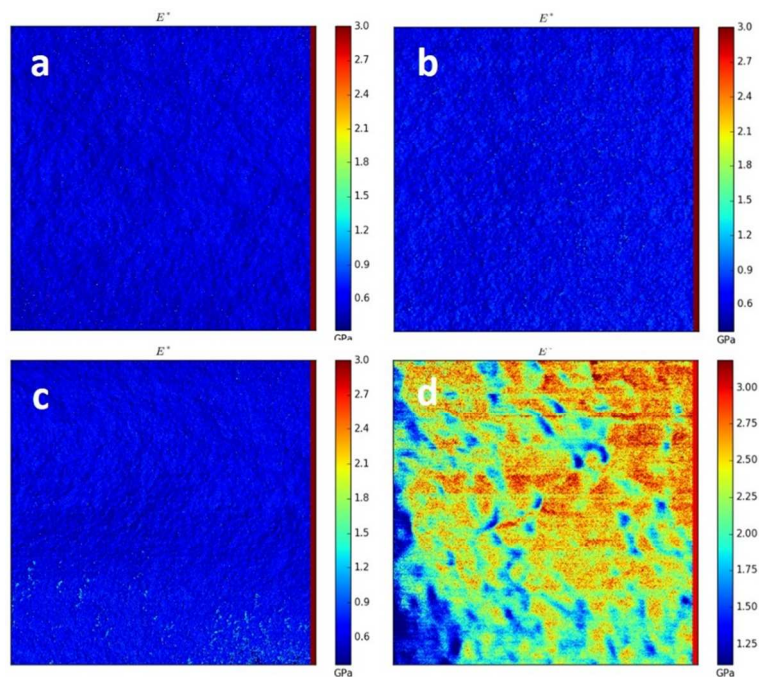

**Figure S3.** DMT modulus mapping of (a) non-illuminated and (b) illuminated area of film exposed to  $1.9\text{ J/cm}^2$ ; (c) non-illuminated and (d) illuminated area of film exposed to  $18\text{ J/cm}^2$ . The scan area is  $2.0\text{ }\mu\text{m} \times 2.0\text{ }\mu\text{m}$ .

**Table S1.** Measured surface modulus as a function of UVA light exposure

| Sample | I dose (J/cm <sup>2</sup> ) | E' (GPa) | Δ E' (GPa) |
|--------|-----------------------------|----------|------------|
| 1      | 0.0                         | 0.570    | 0.025      |
|        | 1.9                         | 0.610    | 0.030      |
| 2      | 0.0                         | 0.605    | 0.028      |
|        | 5.9                         | 0.725    | 0.022      |
| 3      | 0.0                         | 0.610    | 0.032      |
|        | 9.3                         | 0.910    | 0.050      |
| 4      | 0.0                         | 0.630    | 0.040      |
|        | 18.0                        | 2.660    | 0.200      |

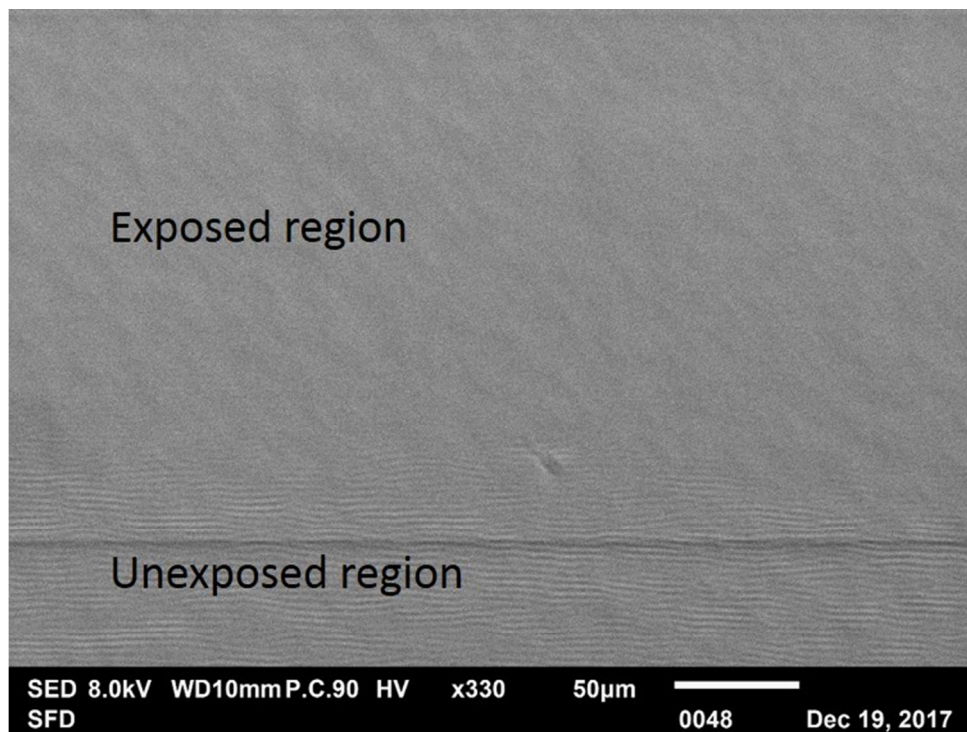

**Figure S4.** SEM image of the surface of the gold-topped LC film at the boundary region between UV exposed (top) and unexposed (bottom) areas after heating of the sample and generation of the wrinkles.
